# Supplementary material for: Turmeric extract-mediated biogenic synthesis of Ag@SeO2 magnetic nanoparticles: characterization, optimization, antibacterial and antioxidant activities
Source: Royal Society of Chemistry journal article supplement (doi:10.1039/d4ra00004h), 2024-01-01
Supplement: d4ra00004h1.pdf [file d4ra00004h1.pdf]

## Supplementary data

### Turmeric extract-mediated biogenic synthesis of Ag@SeO<sub>2</sub> magnetic nanoparticles: Characterization, optimization, antibacterial and antioxidant activities

**Abeer A. Ghoniem; Khaled M. Elattar; Fatimah O. Al-Otibi; Ashraf Elsayed;  
Mohammed S. El-Hersh, Ayman Y. El-Khateeb; Yosra A. Helmy;  
WesamEldin I. A. Saber**

Table S1. The FT-IR absorption bands assignments.

| Wavenumber (cm <sup>-1</sup> ) | Characteristic Group                                         | Turmeric Extract | Ag@SeO <sub>2</sub> bmNPs | Shift (cm <sup>-1</sup> ) |
|--------------------------------|--------------------------------------------------------------|------------------|---------------------------|---------------------------|
| 3318                           | O-H stretching (phenolic, alcoholic)                         | ✓                | ✓ (broader)               | -                         |
| 3296                           | O-H stretching (phenolic, alcoholic)                         | ✗                | ✓ (broader)               | -                         |
| 2973                           | C-H stretching (aliphatic)                                   | ✓                | ✓                         | -                         |
| 2162                           | C≡C stretching (unsaturated)                                 | ✓                | ✓ (shifted)               | -16                       |
| 1652                           | C=O stretching (conjugated ketone, aromatic carboxylic acid) | ✓                | ✓ (shifted)               | 19                        |
| 1515                           | Amide                                                        | ✗                | ✓                         | -                         |
| 1381                           | C-H bending (aromatic)                                       | ✓                | ✓                         | -                         |
| 1087, 1043                     | C-O stretching (carbohydrate, polysaccharide)                | ✓                | ✓                         | -                         |
| 947                            | Se-O stretching                                              | ✗                | ✓                         | -                         |
| 878                            | C-H in-plane bending (aromatic)                              | ✓                | ✗                         | -                         |
| 592                            | Aromatic skeletal vibrations                                 | ✓                | ✗                         | -                         |
| 486                            | Metal-oxygen stretching (Se-O)                               | ✗                | ✓                         | -                         |
| 430                            | O-H out-of-plane bending or C-C/C-N stretching               | ✓                | ✗                         | -                         |

✓ = Peak present; ✗ = Peak absent

Table S2. Particle size distribution estimated from the TEM analysis for Ag@SeO<sub>2</sub> bmNPs.

| <b>Particle size (nm)</b> | <b>Number of particles</b> |
|---------------------------|----------------------------|
| 10-20                     | 15                         |
| 21-30                     | 10                         |
| 31-40                     | 5                          |
| 41-50                     | 3                          |
| 51-60                     | 2                          |
| > 60                      | 1                          |

Table S3. The results of the XRD pattern of Ag@SeO<sub>2</sub> bmNPs.

| Pos.<br>[°2Th.] | Height<br>[cts] | FWHM<br>[°2Th.] | d-spacing<br>[Å] | Rel. Int.<br>[%] | Tip width<br>[°2Th.] | Matched by               |
|-----------------|-----------------|-----------------|------------------|------------------|----------------------|--------------------------|
| 28.0653         | 17.48           | 0.3149          | 3.17945          | 31.77            | 0.3779               |                          |
| 29.6122         | 17.19           | 0.2362          | 3.01679          | 31.24            | 0.2834               | 00-049-1770              |
| 31.8716         | 55.02           | 0.3149          | 2.80790          | 100.00           | 0.3779               | 00-052-0059              |
| 34.4904         | 11.39           | 0.9446          | 2.60046          | 20.70            | 1.1336               |                          |
| 38.0638         | 48.52           | 0.6298          | 2.36415          | 88.18            | 0.7557               | 01-075-0837; 00-052-0059 |
| 44.0496         | 11.41           | 0.6298          | 2.05579          | 20.73            | 0.7557               | 01-075-0837; 00-049-1770 |
| 51.9532         | 11.52           | 0.7872          | 1.76011          | 20.93            | 0.9446               | 00-049-1770              |
| 54.3324         | 9.43            | 0.6298          | 1.68853          | 17.14            | 0.7557               | 00-049-1770              |
| 64.3039         | 19.79           | 0.3936          | 1.44868          | 35.96            | 0.4723               | 01-075-0837              |
| 77.3277         | 12.59           | 0.3840          | 1.23297          | 22.88            | 0.4608               | 01-075-0837              |

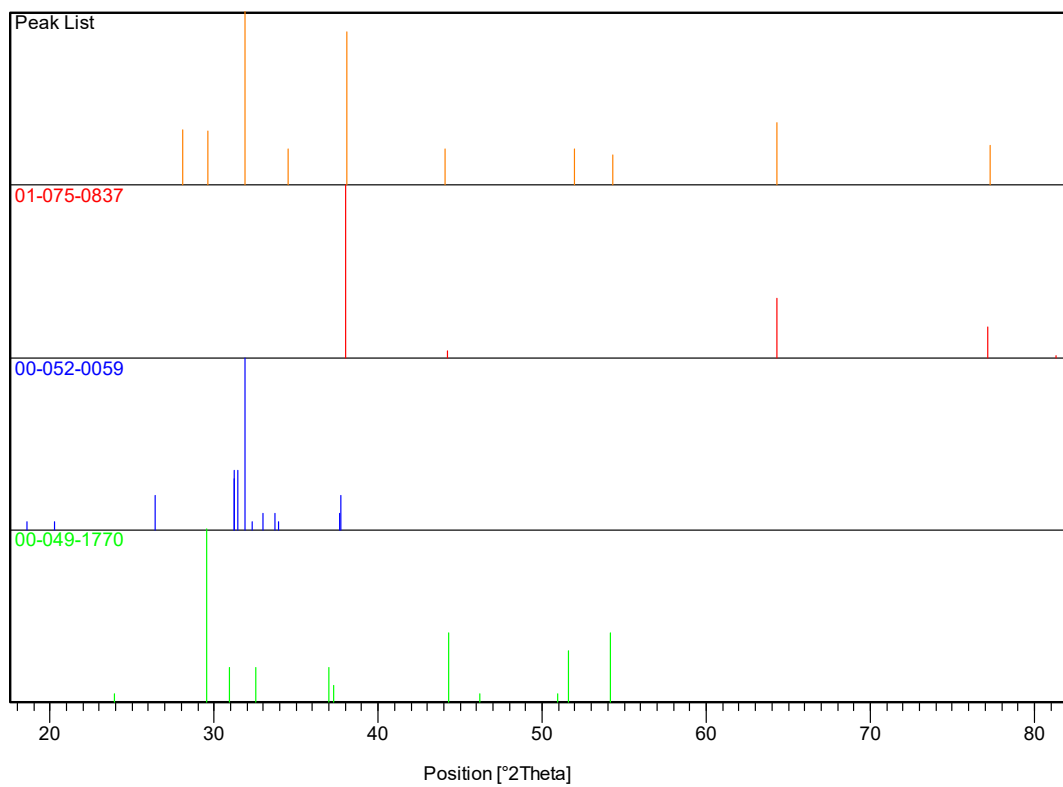

**Figure S1.** XRD analysis pattern of Ag@SeO<sub>2</sub> bmNPs.

## Anchor Scan Parameters:

|                               |                                                                                                       |
|-------------------------------|-------------------------------------------------------------------------------------------------------|
| Dataset Name                  | Ag-SeO <sub>2</sub> Curcuma                                                                           |
| File name                     | E:\X'Pert Data\2023\10\Dr khaled elatar\Ag-SeO <sub>2</sub> Curcuma\Ag-SeO <sub>2</sub> Curcuma.xrdml |
| Comment                       | Configuration=Stage Flat Samples, Owner=r, Creation date=2/28/2009 2:36:26 PM                         |
|                               | Goniometer=PW3050/60 (Theta/Theta); Minimum step size 2Theta:0.001; Minimum step size Omega:0.001     |
|                               | Sample stage=PW3071/xx Bracket                                                                        |
|                               | Diffraction system=XPRT-PRO                                                                           |
|                               | Measurement program=program5, Owner=r, Creation date=12/12/2004 11:02:06 AM                           |
| Measurement Date / Time       | 10/2/2023 4:54:03 PM                                                                                  |
| Operator                      | cwi                                                                                                   |
| Raw Data Origin               | XRD measurement (*.XRDML)                                                                             |
| Scan Axis                     | Gonio                                                                                                 |
| Start Position [°2Th.]        | 5.0100                                                                                                |
| End Position [°2Th.]          | 89.9900                                                                                               |
| Step Size [°2Th.]             | 0.0200                                                                                                |
| Scan Step Time [s]            | 0.9500                                                                                                |
| Scan Type                     | Continuous                                                                                            |
| Offset [°2Th.]                | 0.0000                                                                                                |
| Divergence Slit Type          | Fixed                                                                                                 |
| Divergence Slit Size [°]      | 0.4785                                                                                                |
| Specimen Length [mm]          | 10.00                                                                                                 |
| Receiving Slit Size [mm]      | 0.1000                                                                                                |
| Measurement Temperature [°C]  | 25.00                                                                                                 |
| Anode Material                | Cu                                                                                                    |
| K-Alpha1 [Å]                  | 1.54060                                                                                               |
| K-Alpha2 [Å]                  | 1.54443                                                                                               |
| K-Beta [Å]                    | 1.39225                                                                                               |
| K-A2 / K-A1 Ratio             | 0.50000                                                                                               |
| Generator Settings            | 30 mA, 40 kV                                                                                          |
| Diffraction Type              | 0000000000005545                                                                                      |
| Diffraction Number            | 0                                                                                                     |
| Goniometer Radius [mm]        | 240.00                                                                                                |
| Dist. Focus-Diverg. Slit [mm] | 91.00                                                                                                 |
| Incident Beam Monochromator   | No                                                                                                    |
| Spinning                      | No                                                                                                    |

Table S4. Phytochemical contents of the tested samples.

| Sample                    | Phytochemicals              |                             |
|---------------------------|-----------------------------|-----------------------------|
|                           | Phenolic content (mg GAE/g) | Flavonoid content (mg CE/g) |
| Turmeric extract          | 194.038±2.8                 | 170.606±0.59                |
| Ag@SeO <sub>2</sub> bmNPs | 64.712±1.3                  | 33.362±0.74                 |

**GAE:** Gallic acid equivalents.

**CE:** Catechin equivalents.

\* The values expressed the mean value ± Standard deviation (SD).

\* Values represent individual triplicate measurements.

### ABTS Antioxidant Activity

Table S5. The results of antioxidant activity by ABTS assay.

| Concentration ( $\mu\text{g/mL}$ )    | % Inhibition     |                  |                           |
|---------------------------------------|------------------|------------------|---------------------------|
|                                       | Ascorbic acid    | Turmeric extract | Ag@SeO <sub>2</sub> bmNPs |
| 10                                    | 24.2             | 8.5              | 18.9                      |
| 20                                    | 37.4             | 19.6             | 26.1                      |
| 40                                    | 54.9             | 34.5             | 31.1                      |
| 60                                    | 66.7             | 41.5             | 36.2                      |
| 80                                    | 78.5             | 50.3             | 43.0                      |
| 100                                   | 94.3             | 62.0             | 65.6                      |
| IC <sub>50</sub> ( $\mu\text{g/mL}$ ) | 29.47 $\pm$ 0.17 | 73.42 $\pm$ 0.35 | 84.48 $\pm$ 0.41          |

\* The IC<sub>50</sub> ( $\mu\text{g/mL}$ ) values expressed the mean value  $\pm$  Standard deviation (SD).

\* The results represent individual triplicate measurements.

### DPPH Antioxidant Activity

Table S6. The antioxidant results (% remaining DPPH, % scavenging activity, and IC<sub>50</sub> (μg/mL)) of the investigated plants extracted in water.

| Sample                          | Concentrations (μg/mL) | % Remaining DPPH | % Scavenging activity | IC <sub>50</sub> (μg/ml) |
|---------------------------------|------------------------|------------------|-----------------------|--------------------------|
| <b>Turmeric extract</b>         | 80                     | 26.89            | 73.11                 | 42±0.56                  |
|                                 | 40                     | 49.18            | 50.82                 |                          |
|                                 | 20                     | 73.61            | 26.39                 |                          |
|                                 | 10                     | 87.87            | 12.13                 |                          |
| <b>Ag@SeO<sub>2</sub> bmNPs</b> | 673                    | 15.08            | 84.92                 | 230±1.20                 |
|                                 | 336                    | 33.93            | 66.07                 |                          |
|                                 | 168                    | 59.02            | 40.98                 |                          |
|                                 | 84                     | 79.84            | 20.16                 |                          |
| <b>Ascorbic acid</b>            | 62                     | 15.27            | 84.73                 | 22±0.84                  |
|                                 | 31                     | 39.08            | 60.92                 |                          |
|                                 | 16                     | 61.07            | 38.93                 |                          |
|                                 | 8                      | 74.81            | 25.19                 |                          |

\* The IC<sub>50</sub> (μg/mL) values expressed the mean value ± Standard deviation (SD).

\* The results represent individual triplicate measurements.



## Minimum Inhibitory Concentration (MIC)

### *Bacillus cereus*

After 24 h of incubation at 37 °C, turbidity was noticed in test tube 8 whereas in tube 7 (MIC) no turbidity was seen, exhibiting inhibition of bacterial growth.

Table S7. The measured O.D 600 for *Bacillus cereus*.

| Test tube no.  | Concentration (µg/mL) | O.D600      |
|----------------|-----------------------|-------------|
| <b>1</b>       | 21200                 | 0.000       |
| <b>2</b>       | 10600                 | 0.002       |
| <b>3</b>       | 5300                  | 0.001       |
| <b>4</b>       | 2650                  | 0.000       |
| <b>5</b>       | 1325                  | 0.010       |
| <b>6</b>       | 662.5                 | 0.010       |
| <b>7</b>       | 331.25                | 0.007       |
| <b>8</b>       | <b>165.625</b>        | <b>1.12</b> |
| <b>9</b>       | 82.8125               | 1.14        |
| <b>Control</b> | -                     | 1.3         |

**MIC tube: NO 7**

***Klebsiella Pneumoniae***

After 24 h of incubation at 37 °C, turbidity was noticed in test tube 8 whereas in tube 7 (MIC) no turbidity was seen, exhibiting inhibition of bacterial growth.

Table S8. The measured O.D 600 for *Klebsiella Pneumoniae*.

| <b>Test tube no.</b> | <b>Concentration (µg/mL)</b> | <b>O.D<sub>600</sub></b> |
|----------------------|------------------------------|--------------------------|
| <b>1</b>             | 21200                        | 0.000                    |
| <b>2</b>             | 10600                        | 0.003                    |
| <b>3</b>             | 5300                         | 0.001                    |
| <b>4</b>             | 2650                         | 0.002                    |
| <b>5</b>             | 1325                         | 0.010                    |
| <b>6</b>             | 662.5                        | 0.000                    |
| <b>7</b>             | 331.25                       | 0.001                    |
| <b>8</b>             | <b>165.625</b>               | <b>1.1</b>               |
| <b>9</b>             | 82.8125                      | 1.12                     |
| <b>Control</b>       | -                            | 1.01                     |

**MIC tube: NO 7**

***Escherichia coli***

After 24 h of incubation at 37 °C, turbidity was noticed in test tube 9 whereas in tube 8 (MIC) no turbidity was seen, exhibiting inhibition of bacterial growth.

Table S9. The measured O.D 600 for *E. coli*.

| <b>Test tube no.</b> | <b>Concentration (µg/mL)</b> | <b>O.D<sub>600</sub></b> |
|----------------------|------------------------------|--------------------------|
| <b>1</b>             | 21200                        | 0.000                    |
| <b>2</b>             | 10600                        | 0.002                    |
| <b>3</b>             | 5300                         | 0.001                    |
| <b>4</b>             | 2650                         | 0.001                    |
| <b>5</b>             | 1325                         | 0.000                    |
| <b>6</b>             | 662.5                        | 0.010                    |
| <b>7</b>             | 331.25                       | 0.002                    |
| <b>8</b>             | 165.625                      | 0.001                    |
| <b>9</b>             | <b>82.8125</b>               | <b>0.9</b>               |
| <b>Control</b>       | -                            | 1.1                      |

**MIC tube: NO 8**

***Staphylococcus aureus***

After 24 h of incubation at 37 °C, turbidity was noticed in test tube 9 whereas in tube 8 (MIC) no turbidity was seen, exhibiting inhibition of bacterial growth.

Table S10. The measured O.D 600 for *Staphylococcus aureus*.

| <b>Test tube no.</b> | <b>Concentration (µg/mL)</b> | <b>O.D<sub>600</sub></b> |
|----------------------|------------------------------|--------------------------|
| <b>1</b>             | 21200                        | 0.000                    |
| <b>2</b>             | 10600                        | 0.002                    |
| <b>3</b>             | 5300                         | 0.001                    |
| <b>4</b>             | 2650                         | 0.000                    |
| <b>5</b>             | 1325                         | 0.010                    |
| <b>6</b>             | 662.5                        | 0.010                    |
| <b>7</b>             | 331.25                       | 0.007                    |
| <b>8</b>             | 165.625                      | 0.001                    |
| <b>9</b>             | <b>82.8125</b>               | <b>0.78</b>              |
| <b>Control</b>       | -                            | 1.2                      |

**MIC tube: NO 8**

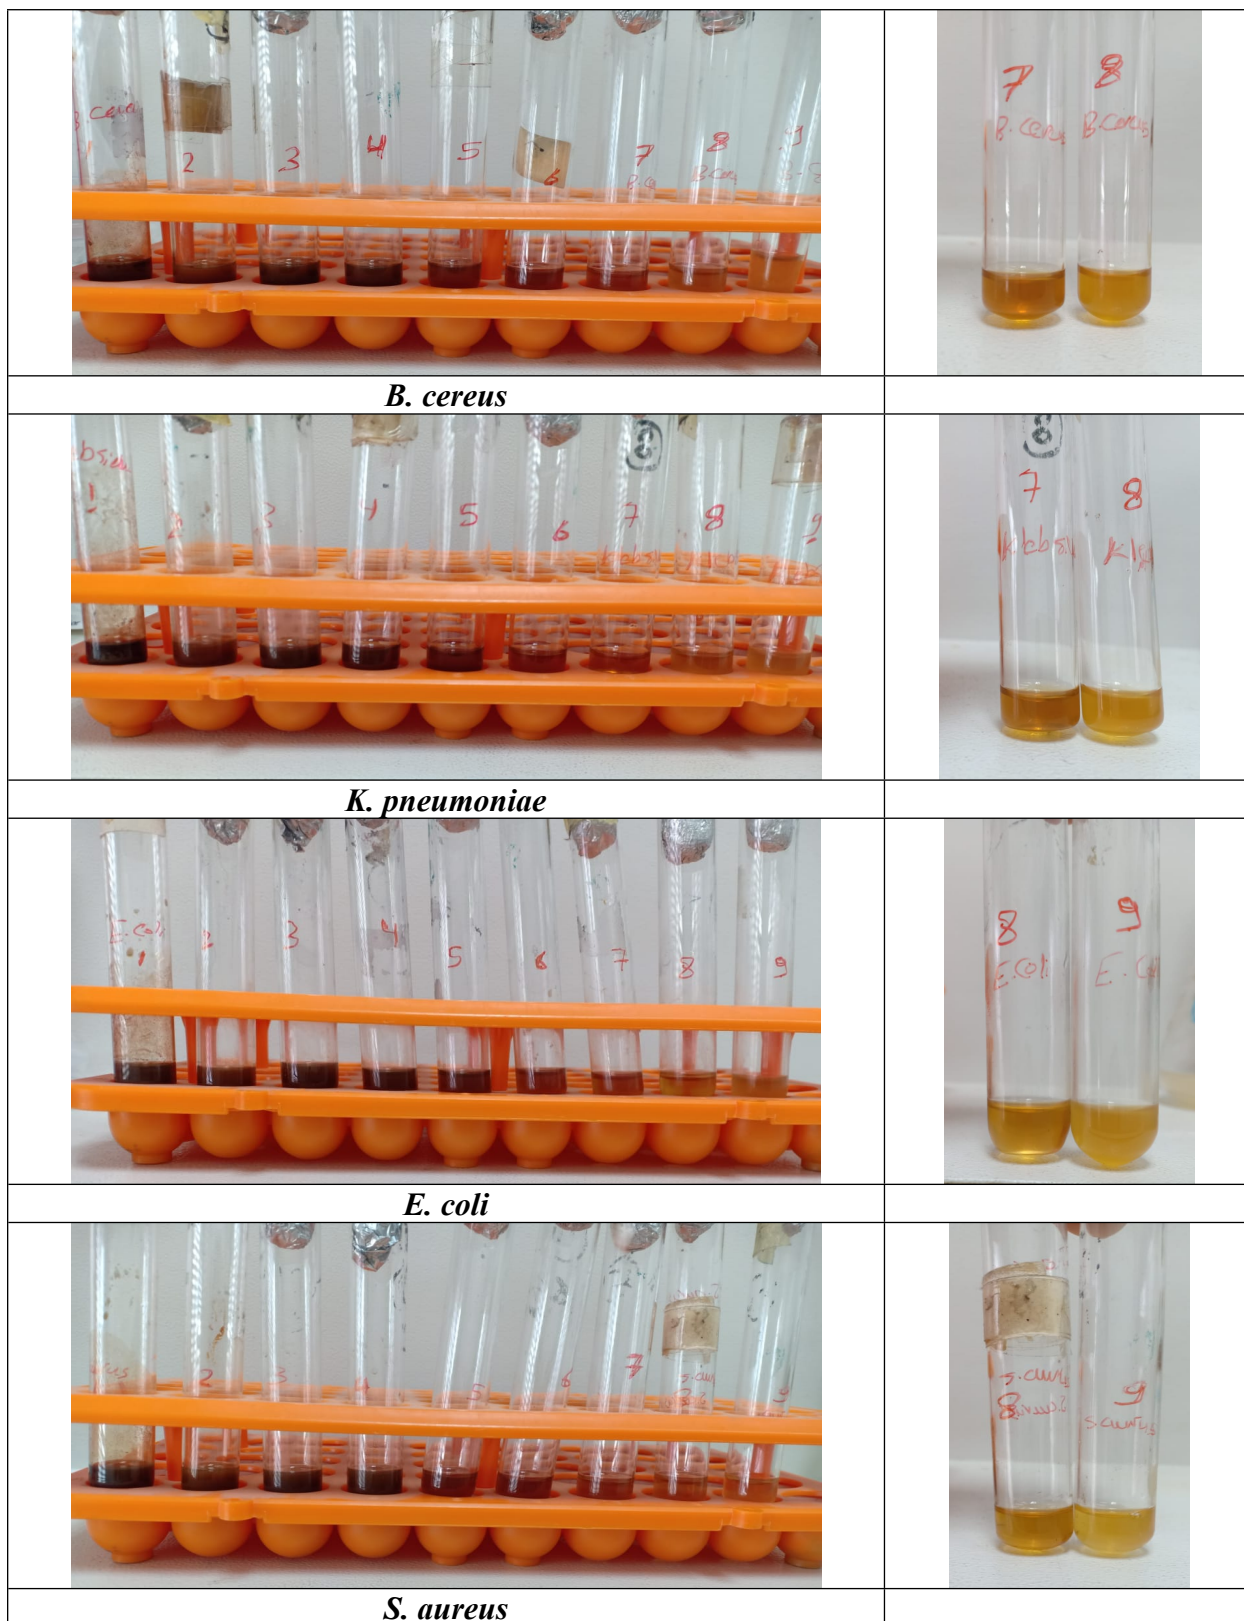

**Figure S2.** MIC test for Ag@SeO<sub>2</sub> bmNPs against various bacterial species.
